# Supplementary material
Source: PubMed Central journal article supplement (PMC3289749)

**Supplementary figure 1.** Time course of the absolute change in body weight (left) or rectal temperature (right) measured over the six hour dosing regimen at the maximum unit dosage of MDMA (closed squares), METH (closed circles), and PCA (closed triangles) in comparison to saline (open squares). *Abcissae:* Elapsed experimental time expressed in minutes and plotted on a linear scale *Ordinates:* Peak absolute change in body weight (left) or rectal temperature (right) measured in grams or degrees Celsius respectively and plotted on a linear scale. Values are normalized to the baseline value for each subject.

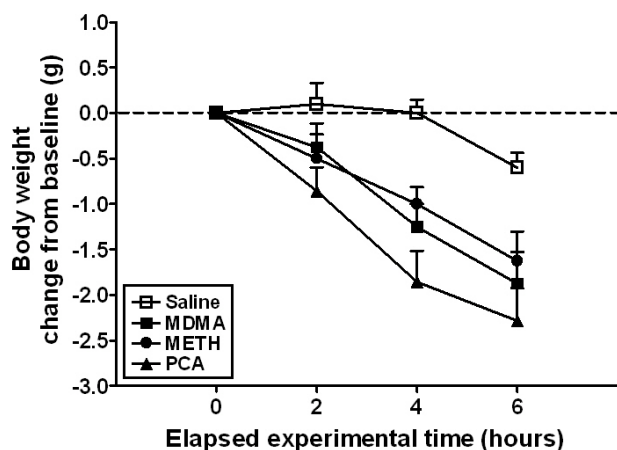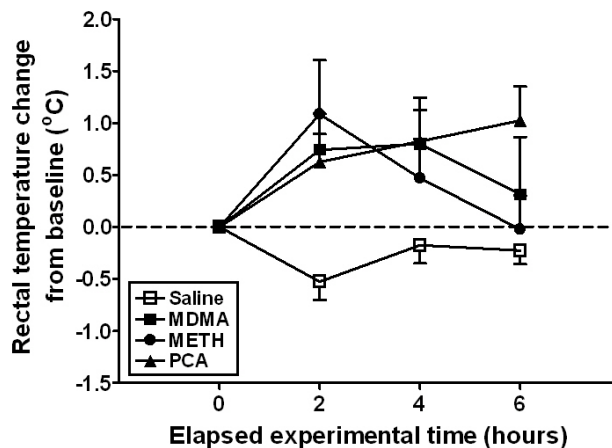

Supplement: NIHMS339963-supplement-1.pdf [file NIHMS339963-supplement-1.pdf]
